# Supplementary material
Source: publisher figshare collection journal article supplement (https://acs.figshare.com/ndownloader/files/4350673)
Supplement: Supplementary file 1 [file 4350673]

## SUPPORTING INFORMATION

### **Facile Fabrication of Branched Gold Nanoparticles by Reductive Hydroxyphenol Derivatives**

*Yuhan Lee, Tae Gwan Park\**

*Department of Biological Sciences and Graduate School of Nanoscience and Technology*

*Korea Advanced Institute of Science and Technology Daejeon 305-701, Republic of Korea*

Keywords: nanoparticle, nanostructure, hydroxyphenol, quinone, dopamine polymerization

Corresponding Author: T. G. Park

Tel: +82-42-350-2621

Fax: +82-42-350-2610

E-mail address: [tgpark@kaist.ac.kr](mailto:tgpark@kaist.ac.kr) (T. G. Park)

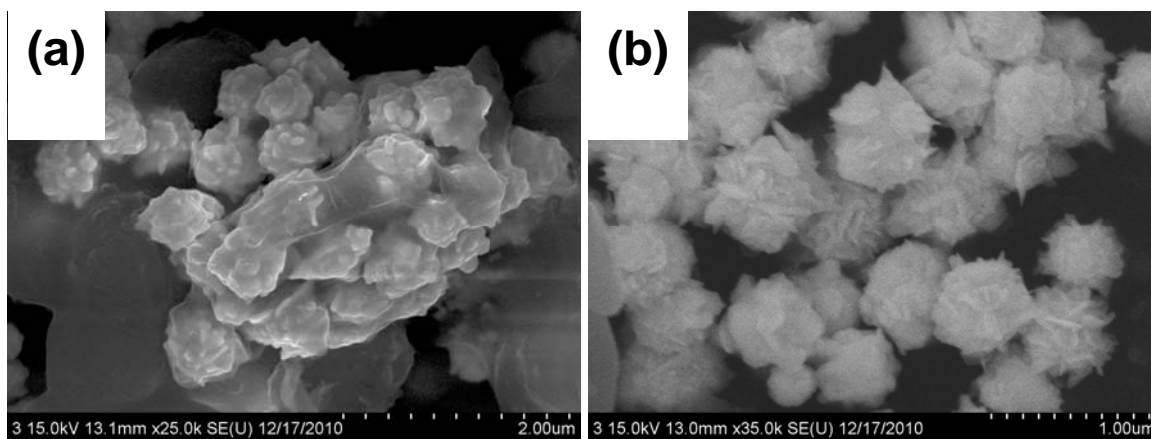

**Figure S1.** FE-SEM images of branched AuNPs fabricated using (a) benzene-1,2,3-triol, and (b) benzene-1,2-diol.

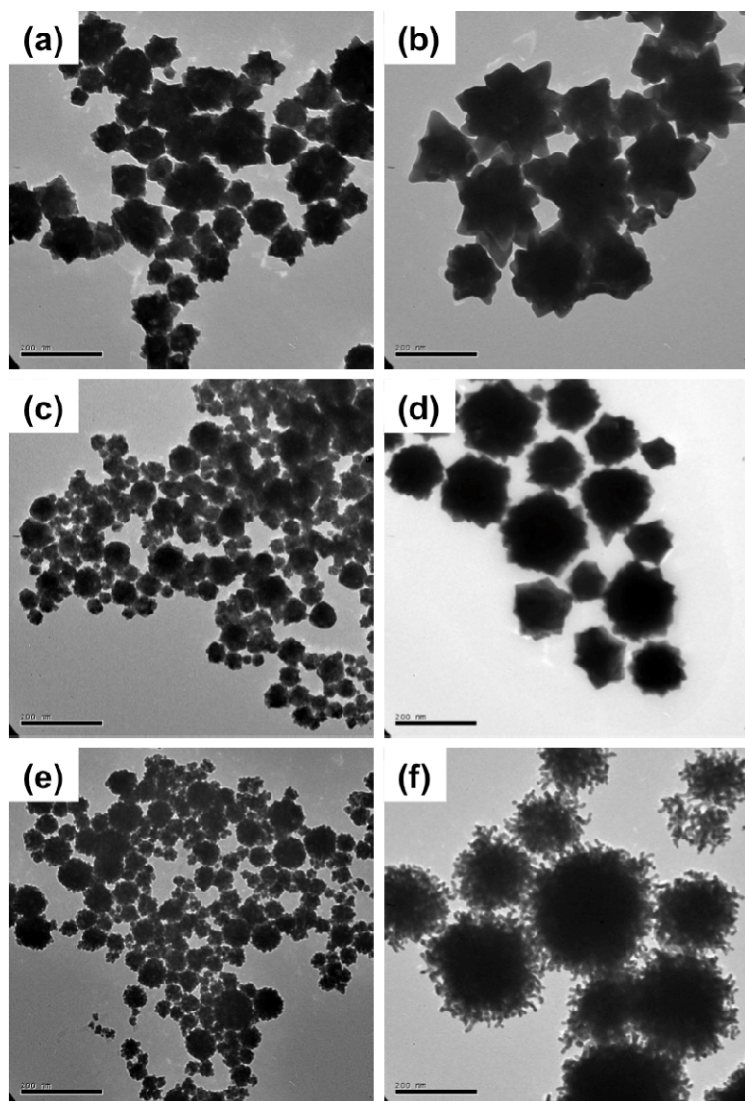

**Figure S2.** TEM images of gold nanoparticles fabricated by (a) bezene-1,2,3-triol, (b) benzene-1,4-diol, (c) benzene-1,2,4-triol, (d) benzene-1,2-diol, (e) benzene-1,3,5-triol, and (f) benzene-1,3-diol. Scale bar: 200 nm.

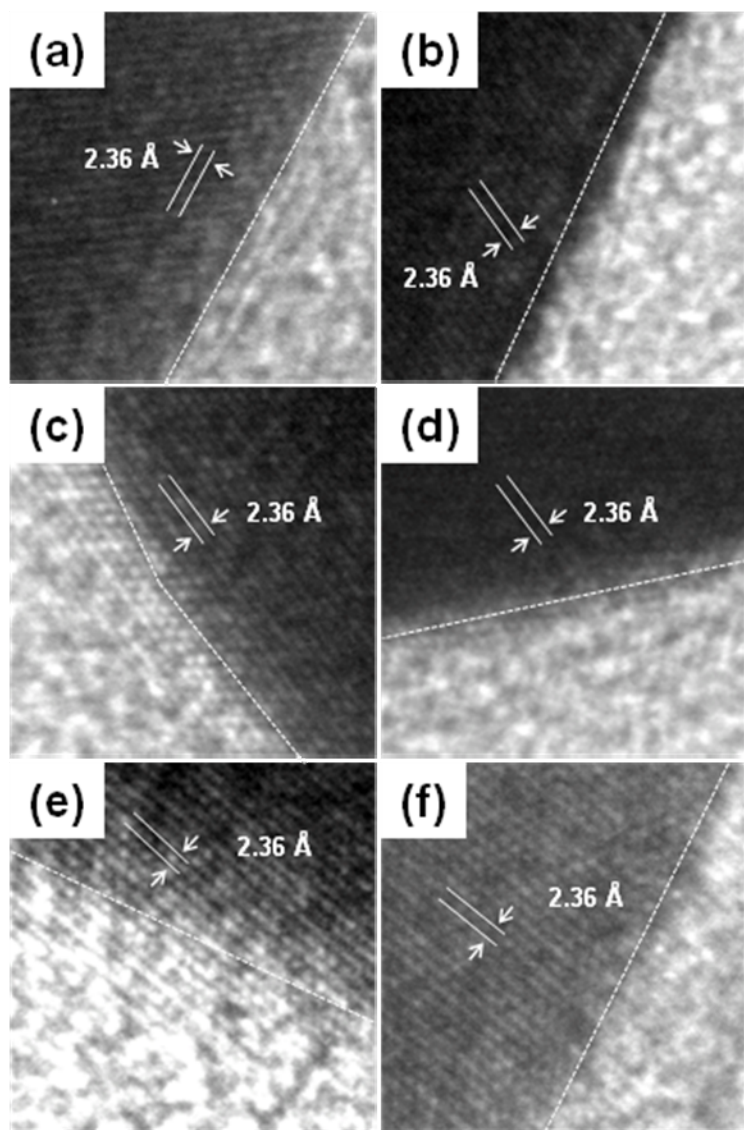

**Figure S3.** High-resolution transmission electron microscopy (HR-TEM) images of various facets of branched gold nanoparticles fabricated by hydroxyphenols.

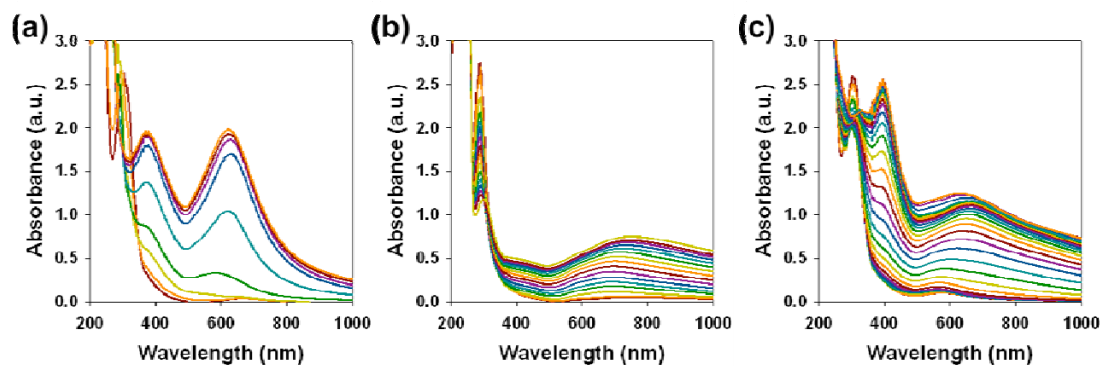

**Figure S4.** Kinetic analysis of gold nanoparticle fabrication process using UV-Vis spectroscopy. Each UV-Vis spectrum was observed every 1 sec. (a) benzene-1,2,4-triol, (b) hydroxyquinone, and (c) benzene-1,2,3-triol.

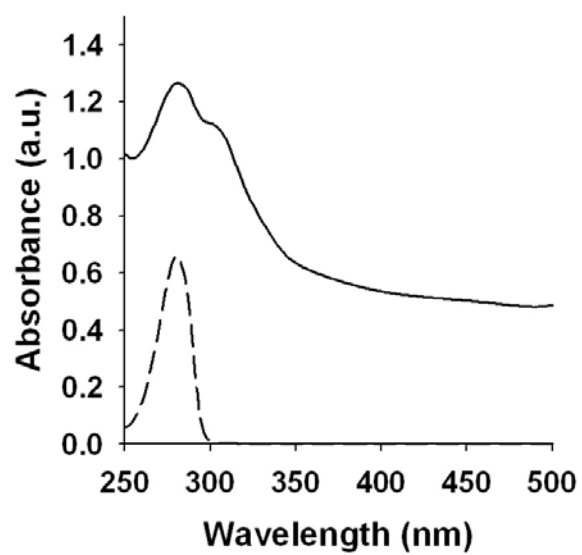

**Figure S5.** UV-vis spectrum of (a) dopamine solution in DDW, and (b) reaction product of Au(III) and dopamine in DDW.
